# Supplementary material for: Simultaneous efficient adsorption and accelerated photocatalytic degradation of chlortetracycline hydrochloride over novel Fe-based MOGs under visible light irradiation assisted by hydrogen peroxide
Source: Royal Society of Chemistry journal article supplement (doi:10.1039/c9qi00046a), 2019-01-01
Supplement: c9qi00046a1.pdf [file c9qi00046a1.pdf]

Supporting information for

**Simultaneously efficient adsorption and accelerated photocatalytic degradation of chlortetracycline hydrochloride over novel Fe-based MOGs under visible light irradiation cooperated by hydrogen peroxide**

Meijun Liu,<sup>a</sup> Donglei Zou,<sup>a</sup> Taigang Ma,<sup>a</sup> Zhi Liu<sup>c</sup> and Yangxue Li<sup>\*a,b</sup>

<sup>a</sup> Key Lab of Groundwater Resources and Environment, Ministry of Education, Jilin University, 2519 Jiefang Road, Changchun 130021, P. R. China. Email: yangxueli@jlu.edu.cn

<sup>b</sup> State Key Laboratory of Superhard Materials, Jilin University, 2699 Qianjin Street, Changchun 130012, P. R. China

<sup>c</sup> School of Municipal and Environmental Engineering, Jilin Jianzhu University, 5088 Xincheng Street, Changchun 130118, P. R. China

## Contents

### ✧ Figures

1. The viscoelastic properties of JLUE-MOG-1 and JLUE-MOG-2.
2. The XRD patterns of JLUE-MOG-1 and JLUE-MOG-2.
3. XPS spectra of JLUE-MOG-2.
4. The BET results of JLUE-MOG-2.
5. The UV-vis diffuse reflectance spectra of JLUE-MOG-2.
6. Pseudo-first-order kinetic model, pseudo-second-order kinetic model and intraparticle diffusion model fittings for the CTC adsorption by JLUE-MOG-1 and JLUE-MOG-2.
7. Freundlich and Langmuir linear fittings for the CTC adsorption by JLUE-MOG-1 and JLUE-MOG-2.
8. The variances of adsorption amount, total removal amount and the value of  $\xi$  of (a) JLUE-MOG-1 and (b) JLUE-MOG-2 at different time.
9. Pseudo-second-order kinetic model fittings for the CTC degradation under various conditions.
10. Pseudo-first-order kinetic model and pseudo-second-order kinetic model fittings for CTC degradation with different dosages of JLUE-MOG-1 and JLUE-MOG-2.
11. Pseudo-first-order kinetic model and pseudo-second-order kinetic model fittings for CTC degradation with various  $H_2O_2$  concentrations by JLUE-MOG-1 and JLUE-MOG-2.
12. Pseudo-first-order kinetic model and pseudo-second-order kinetic model fittings for CTC degradation under various pH with JLUE-MOG-1 and JLUE-MOG-2.

✧ Tables

1. Pseudo-first-order kinetic model parameters for CTC adsorption by JLUE-MOG-1 and JLUE-MOG-2.
2. Pseudo-second-order kinetic model parameters for CTC adsorption by JLUE-MOG-1 and JLUE-MOG-2.
3. Intraparticle diffusion model parameters for CTC adsorption by JLUE-MOG-1 and JLUE-MOG-2.
4. Freundlich and Langmuir adsorption isotherm model parameters for CTC adsorption by JLUE-MOG-1 and JLUE-MOG-2.
5. Pseudo-first-order kinetic model and pseudo-second-order kinetic model parameters for CTC degradation.
6. Comparison of CTC degradation by various catalysts.
7. Pseudo-second-order kinetic model parameters under various conditions for CTC degradation by JLUE-MOG-1.
8. Pseudo-first-order kinetic model and pseudo-second-order kinetic model parameters for CTC degradation by JLUE-MOG-1 under various conditions.
9. Pseudo-first-order kinetic model and pseudo-second-order kinetic model parameters for CTC degradation by JLUE-MOG-2 under various conditions.

## Figures

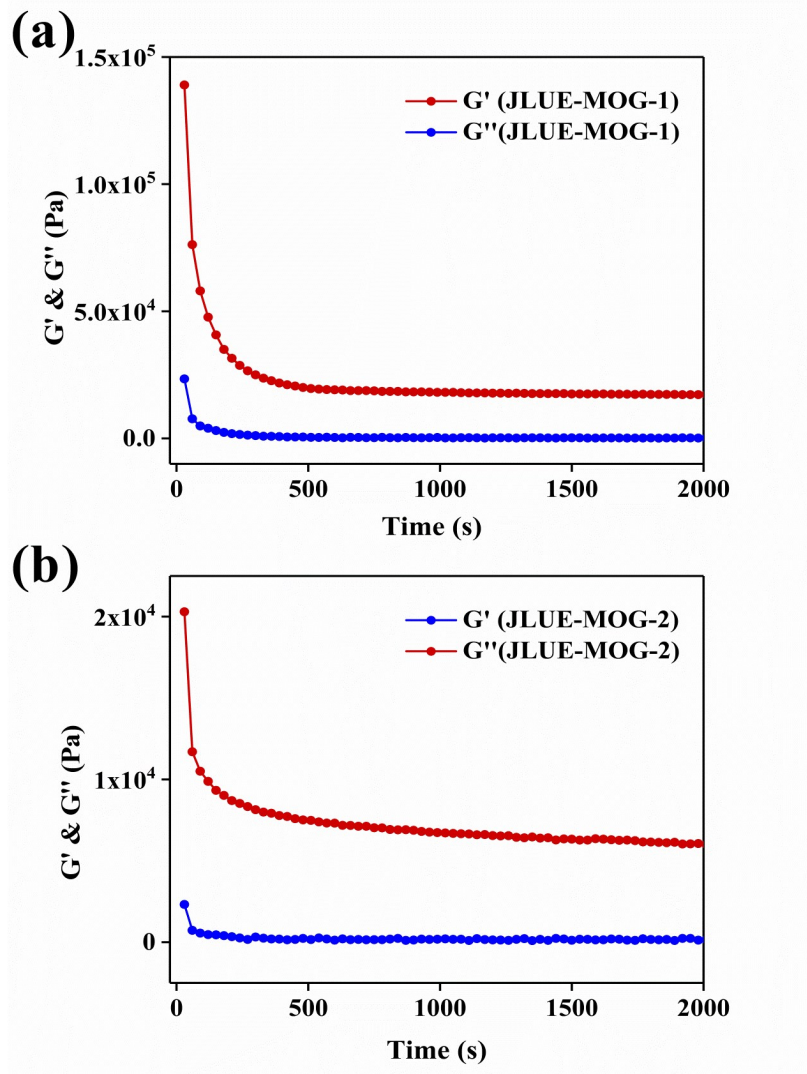

Fig. S1 The viscoelastic properties of (a) JLUE-MOG-1 and (b) JLUE-MOG-2.

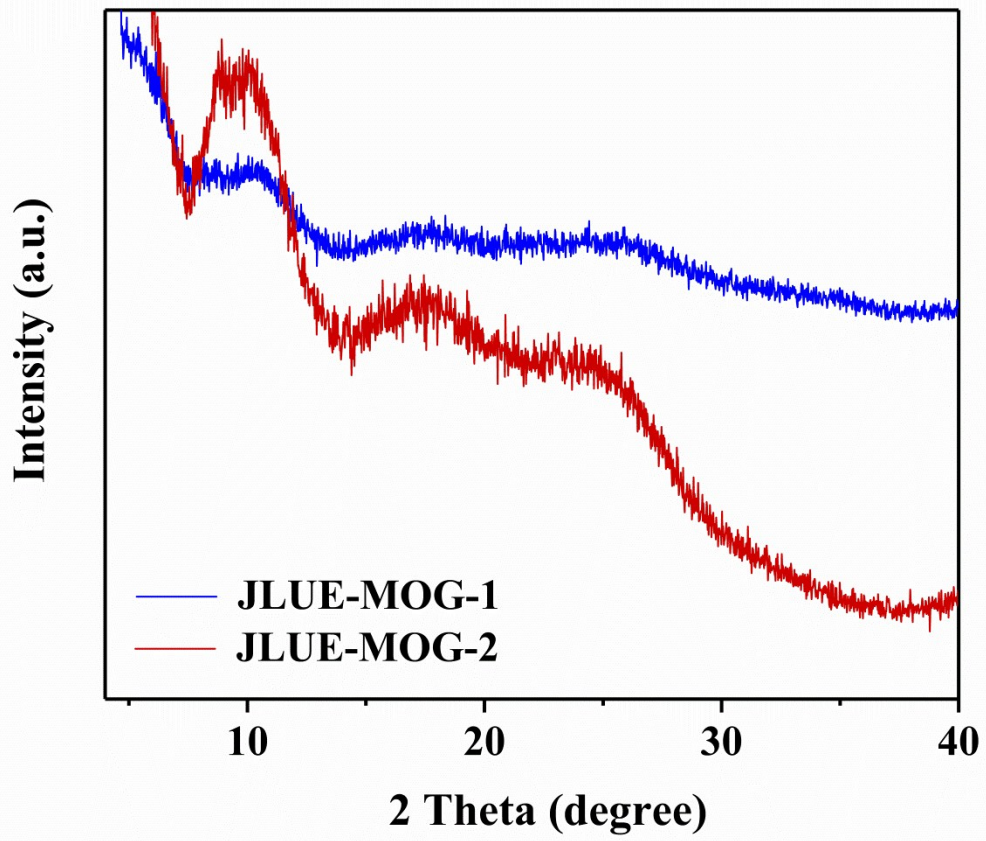

Fig. S2 The XRD patterns of JLUE-MOG-1 and JLUE-MOG-2.

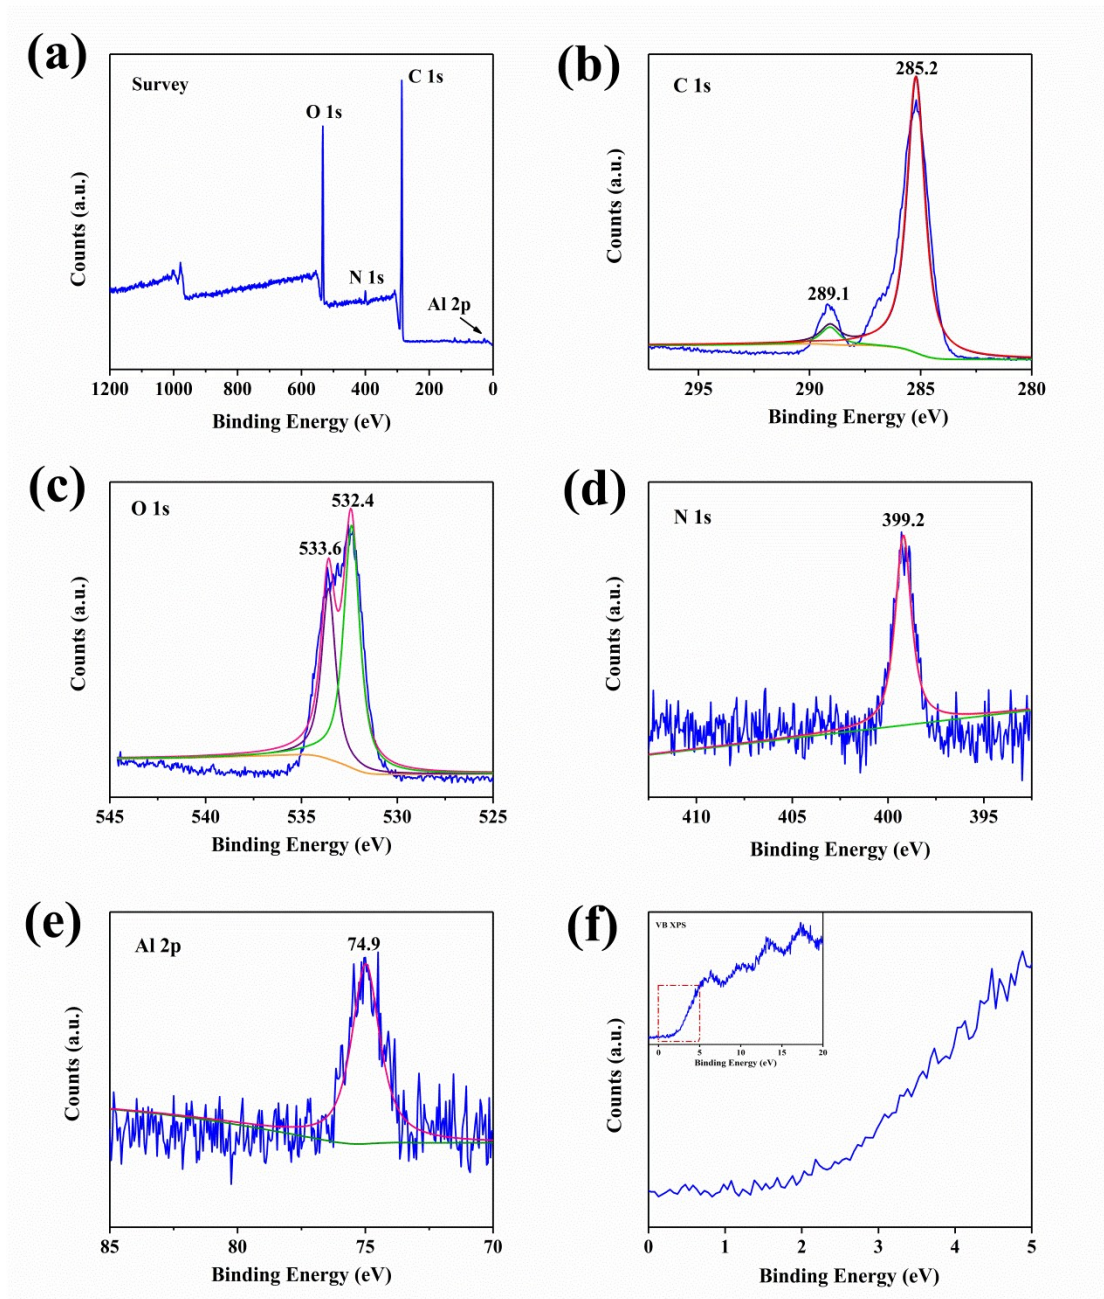

Fig. S3 XPS spectra of JLUE-MOG-2: (a) Survey spectrum; (b) High-resolution spectrum of C 1s; (c) High-resolution spectrum of O 1s; (d) High-resolution spectrum of N 1s; (e) High-resolution spectrum of Al 2p; (f) Valence band XPS spectrum.

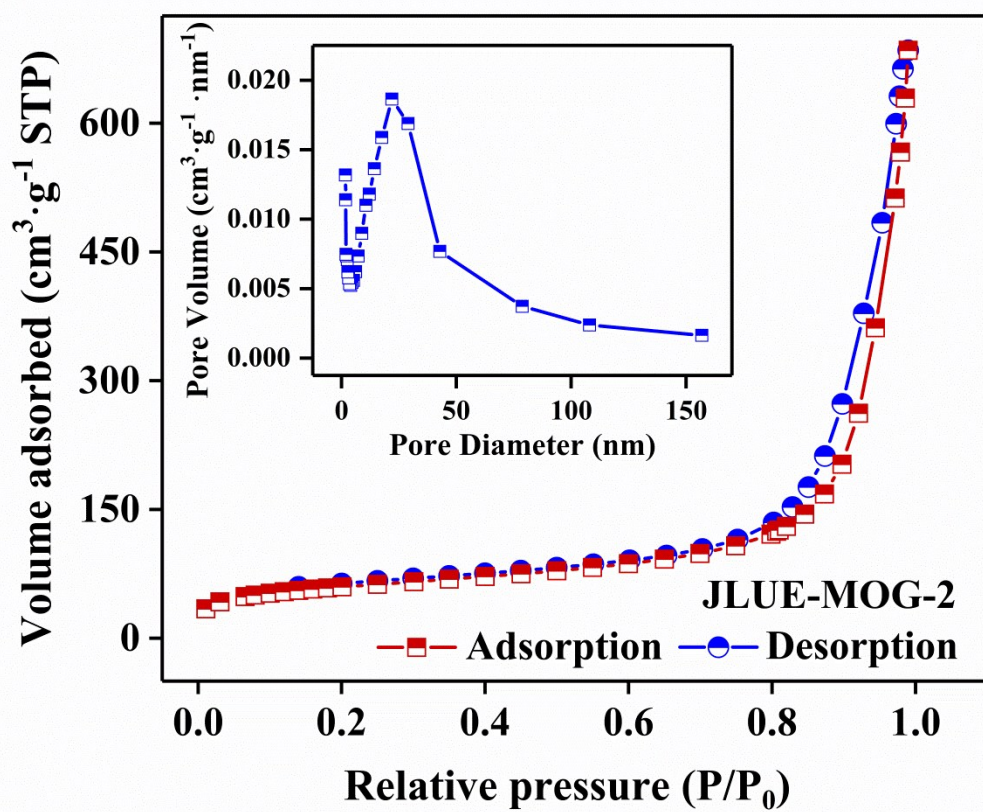

Fig. S4 The BET results of JLUE-MOG-2.

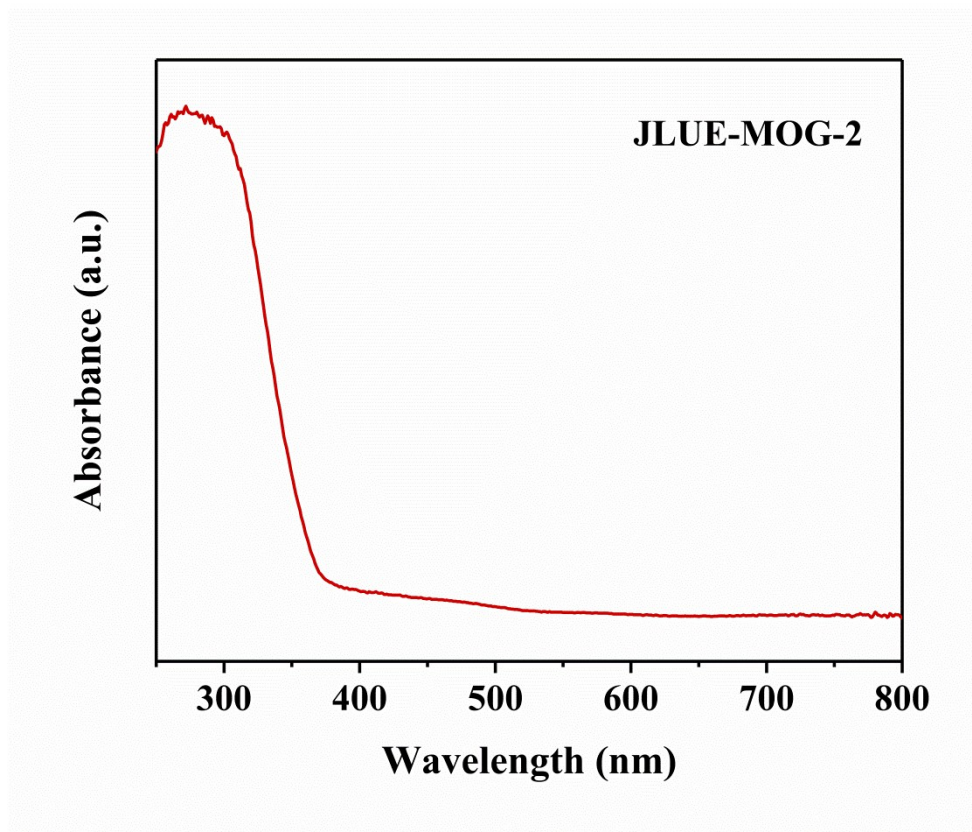

Fig. S5 The UV-vis diffuse reflectance spectra of JLUE-MOG-2.



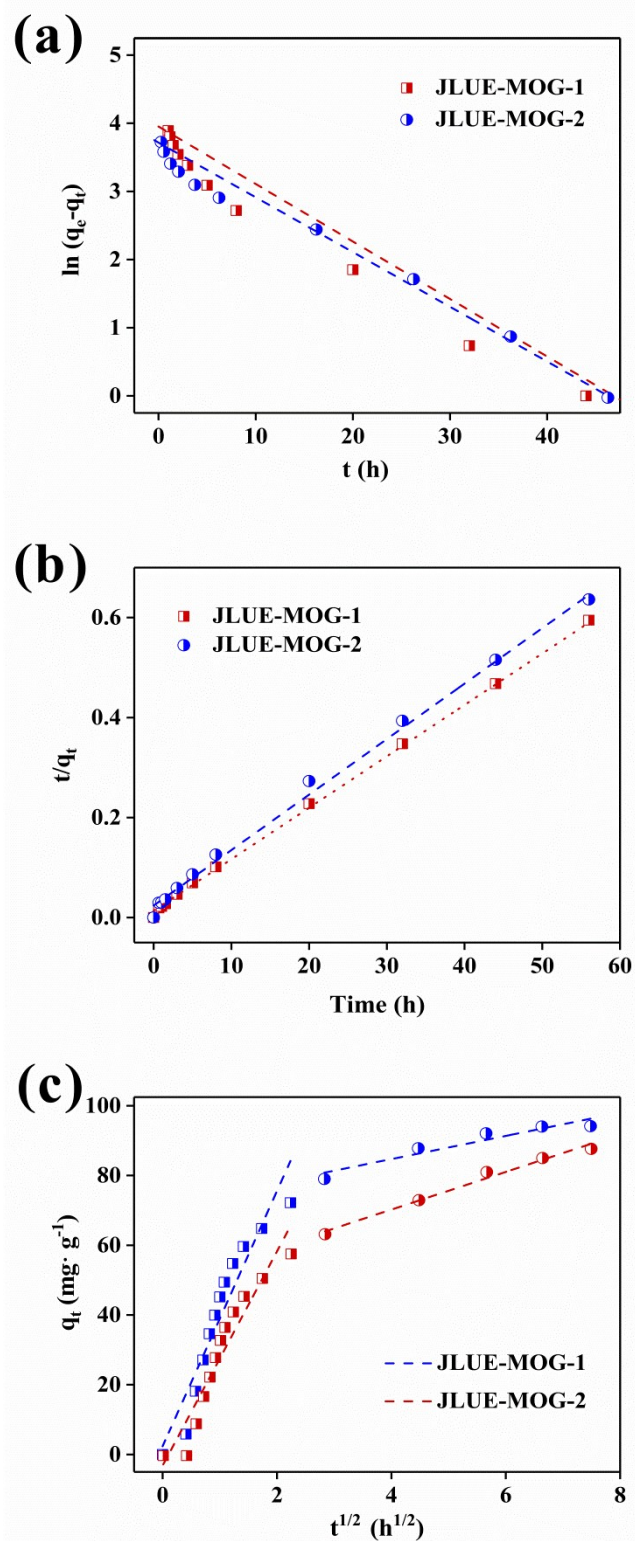

Fig. S6 (a) Pseudo-first-order kinetic model; (b) Pseudo-second-order kinetic model and (c) Intraparticle diffusion model fittings for the CTC adsorption by JLUE-MOG-1 and JLUE-MOG-2.

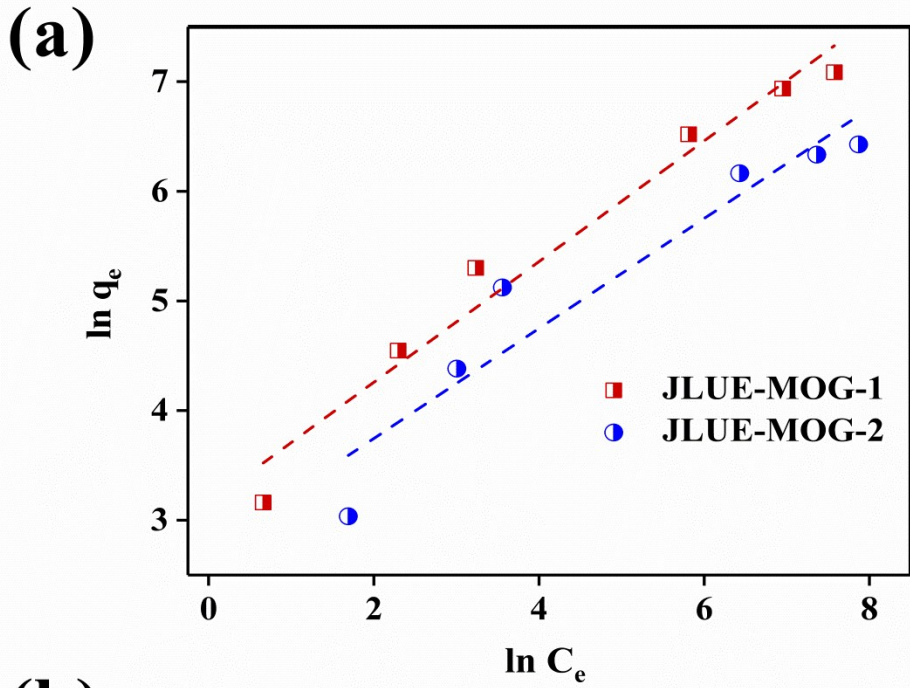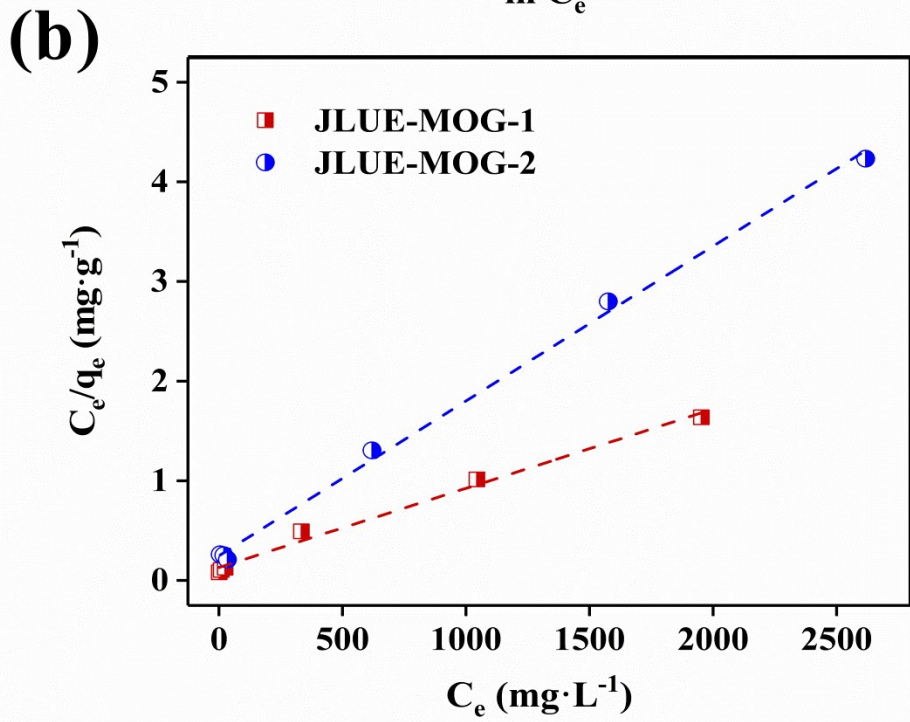

Fig. S7 (a) Freundlich and (b) Langmuir linear fittings for the CTC adsorption by JLUE-MOG-1 and JLUE-MOG-2.

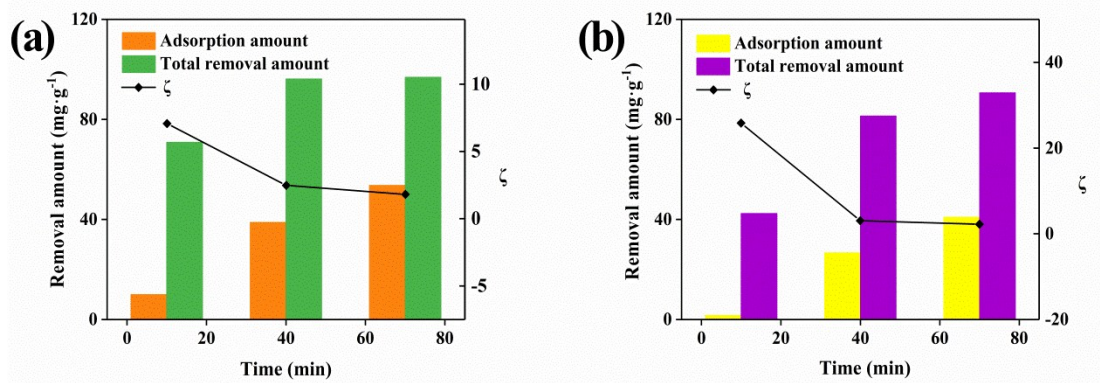

Fig. S8 The variances of adsorption amount, total removal amount and the value of  $\xi$  of (a) JLUE-MOG-1 and (b) JLUE-MOG-2 at different time.

In our study, the photocatalytic level coefficient " $\xi$ " is defined as:<sup>a</sup>

$$\xi = \frac{\text{Total removal amount}}{\text{Adsorption amount}}$$

Where  $\xi$  is the photocatalytic level coefficient; total removal amount is the total removal amount of CTC during adsorption-photocatalytic process ( $\text{mg}\cdot\text{g}^{-1}$ ); adsorption amount is the CTC adsorption amount in the dark environment ( $\text{mg}\cdot\text{g}^{-1}$ ).

<sup>a</sup> Photocatalysis and adsorption should occur simultaneously.

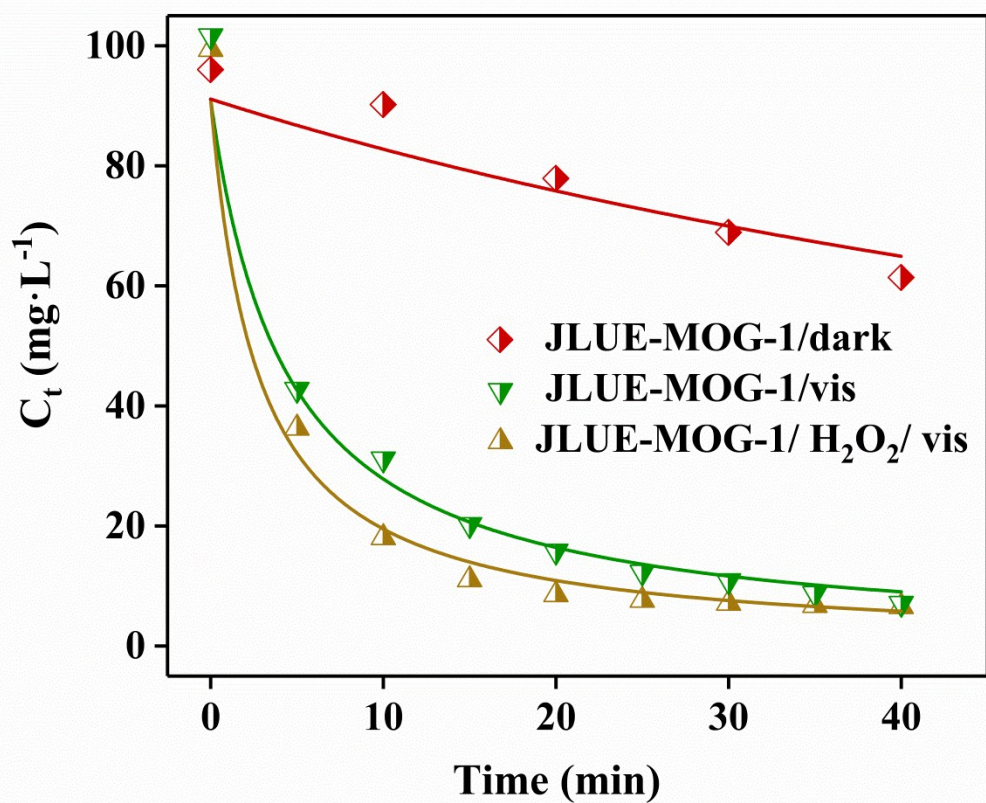

Fig. S9 Pseudo-second-order kinetic model fittings for the CTC degradation under various conditions.

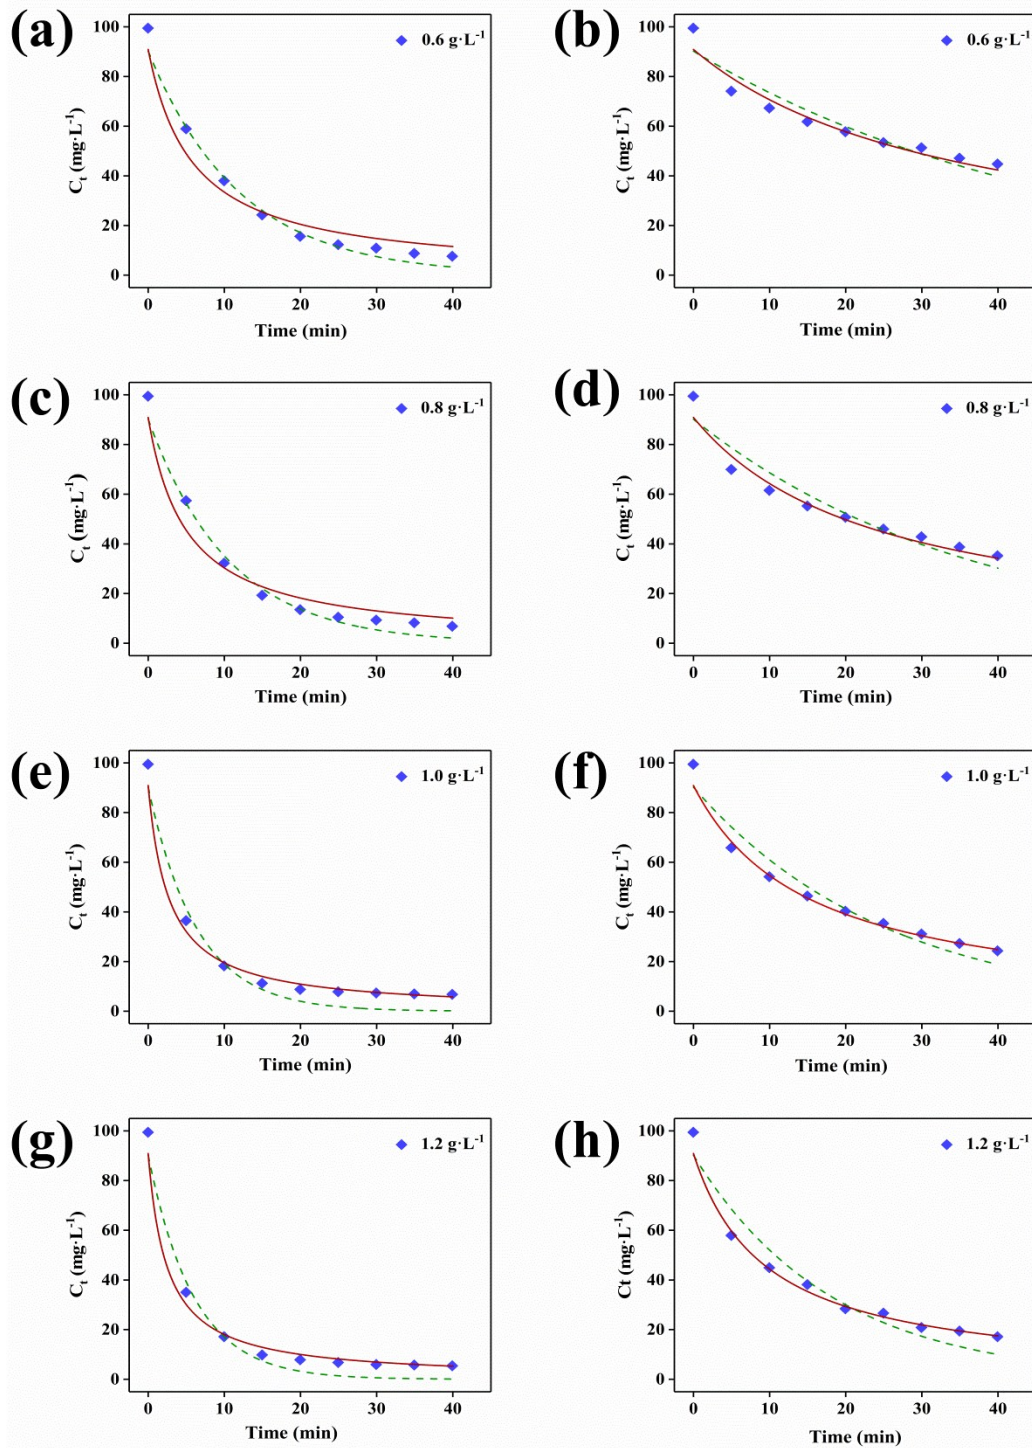

Fig. S10 Pseudo-first-order kinetic model (green dash line) and pseudo-second-order kinetic model (red solid line) fittings for CTC degradation with different dosages of (a, c, e, g) JLUE-MOG-1 and (b, d, f, h) JLUE-MOG-2. (pH=7,  $\text{H}_2\text{O}_2$  concentration: 10 mM).

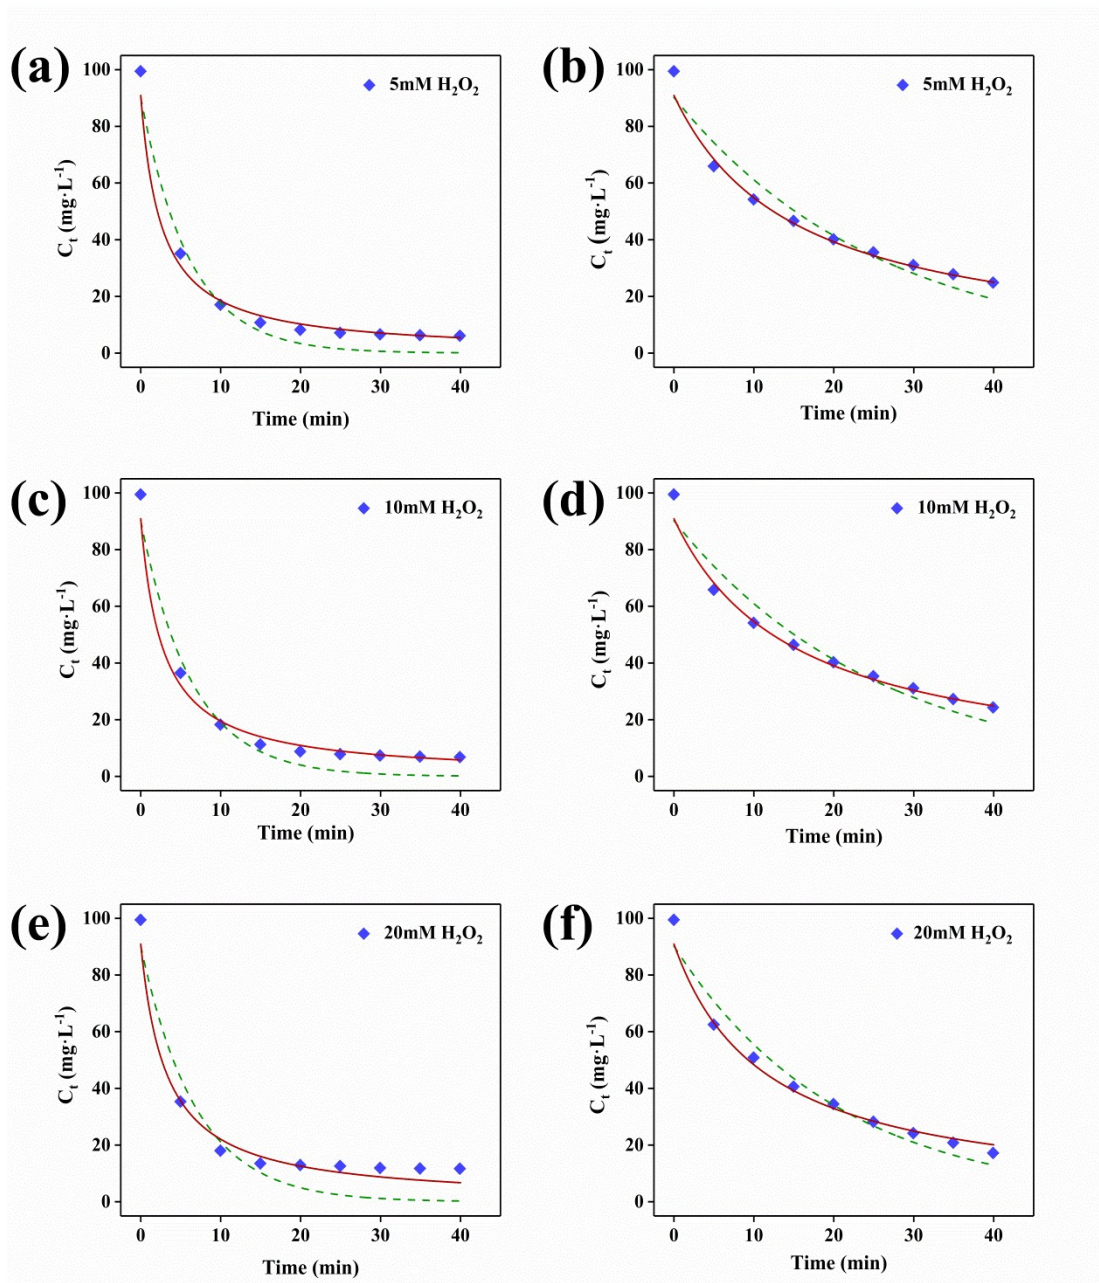

Fig. S11 Pseudo-first-order kinetic model (green dash line) and pseudo-second-order kinetic model (red solid line) fittings for CTC degradation with various  $\text{H}_2\text{O}_2$  concentrations by (a, c, e) JLUE-MOG-1 and (b, d, f) JLUE-MOG-2. (pH=7, catalyst dosage:  $1\text{g}\cdot\text{L}^{-1}$ ).

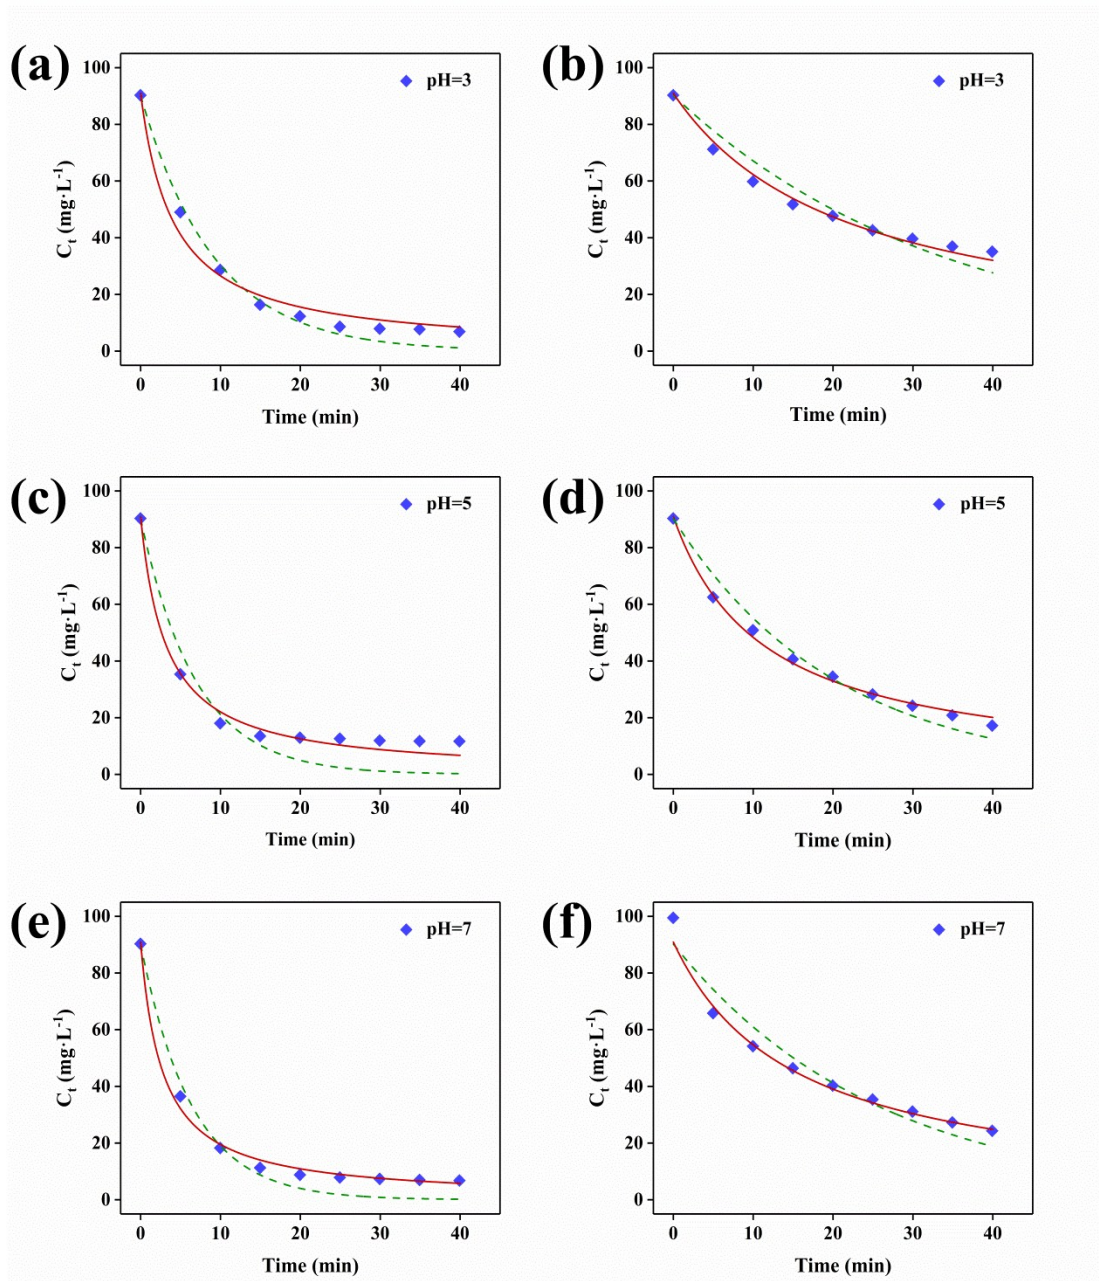

Fig. S12 Pseudo-first-order kinetic model (green dash line) and pseudo-second-order kinetic model (red solid line) fittings for CTC degradation under various pH by (a, c, e) JLUE-MOG-1 and (b, d, f) JLUE-MOG-2. ( $\text{H}_2\text{O}_2$  concentration: 10mM, catalyst dosage:  $1\text{g}\cdot\text{L}^{-1}$ ).

## Tables

Table S1 Pseudo-first-order kinetic model parameters for CTC adsorption by JLUE-MOG-1 and JLUE-MOG-2.

| JLUE-MOGs  | $q_{e,exp}$<br>( $mg \cdot g^{-1}$ ) | Removal<br>Efficiency<br>(%) | Pseudo-first-order kinetics |                                         |                     |       |
|------------|--------------------------------------|------------------------------|-----------------------------|-----------------------------------------|---------------------|-------|
|            |                                      |                              | $k_1$<br>( $h^{-1}$ )       | $q_{e1,theor}$<br>( $mg \cdot g^{-1}$ ) | $\Delta q_1$<br>(%) | $R^2$ |
| JLUE-MOG-1 | 94.18                                | 94.18                        | 0.084                       | 51.94                                   | 81.32               | 0.92  |
| JLUE-MOG-2 | 88.00                                | 88.00                        | 0.073                       | 61.56                                   | 42.95               | 0.97  |

Table S2 Pseudo-second-order kinetic model parameters for CTC adsorption by JLUE-MOG-1 and JLUE-MOG-2.

| JLUE-MOGs  | $q_{e,exp}$<br>( $mg \cdot g^{-1}$ ) | Removal<br>Efficiency<br>(%) | Pseudo-second-order kinetics                |                                         |                     |       |
|------------|--------------------------------------|------------------------------|---------------------------------------------|-----------------------------------------|---------------------|-------|
|            |                                      |                              | $k_2$<br>( $g \cdot mg^{-1} \cdot h^{-1}$ ) | $q_{e2,theor}$<br>( $mg \cdot g^{-1}$ ) | $\Delta q_2$<br>(%) | $R^2$ |
| JLUE-MOG-1 | 94.18                                | 94.18                        | 0.010                                       | 97.56                                   | 3.46                | 1.00  |
| JLUE-MOG-2 | 88.00                                | 88.00                        | 0.011                                       | 87.50                                   | 0.57                | 0.99  |



Table S3 Intraparticle diffusion model parameters for CTC adsorption by JLUE-MOG-1 and JLUE-MOG-2.

| JLUE-MOGs | Intraparticle diffusion model                         |                                   |       |                                                       |                                   |       |
|-----------|-------------------------------------------------------|-----------------------------------|-------|-------------------------------------------------------|-----------------------------------|-------|
|           | $k_{i,1}$                                             | $C_1$                             | $R^2$ | $k_{i,2}$                                             | $C_2$                             | $R^2$ |
|           | ( $\text{mg}\cdot\text{g}^{-1}\cdot\text{h}^{-1/2}$ ) | ( $\text{mg}\cdot\text{g}^{-1}$ ) |       | ( $\text{mg}\cdot\text{g}^{-1}\cdot\text{h}^{-1/2}$ ) | ( $\text{mg}\cdot\text{g}^{-1}$ ) |       |
| JLUE-MOG- | 36.60                                                 | 2.36                              | 0.90  | 3.33                                                  | 71.42                             | 0.89  |
| JLUE-MOG- | 30.73                                                 | 2.52                              | 0.91  | 5.40                                                  | 49.03                             | 0.98  |

Table S4 Freundlich and Langmuir adsorption isotherm model parameters for CTC adsorption by JLUE-MOG-1 and JLUE-MOG-2.

| JLUE-MOGs  | Freundlich isotherm |       |       | Langmuir isotherm                          |       |       |
|------------|---------------------|-------|-------|--------------------------------------------|-------|-------|
|            | $n$                 | $K_F$ | $R^2$ | $Q_m$<br>( $\text{mg}\cdot\text{g}^{-1}$ ) | $K_L$ | $R^2$ |
| JLUE-MOG-1 | 1.82                | 23.57 | 0.98  | 1259.45                                    | 7.69  | 0.99  |
| JLUE-MOG-2 | 2.00                | 15.49 | 0.96  | 625.00                                     | 4.00  | 0.99  |

Table S5 Pseudo-first-order kinetic model and pseudo-second-order kinetic model parameters for CTC degradation.

| JLUE-MOGs  | $C_{t,\text{exp}}$<br>( $\text{mg}\cdot\text{L}^{-1}$ ) | Removal Efficiency<br>(%) | Pseudo-first-order kinetics    |                                                           |       | Pseudo-second-order kinetics                                   |                                                           |       |
|------------|---------------------------------------------------------|---------------------------|--------------------------------|-----------------------------------------------------------|-------|----------------------------------------------------------------|-----------------------------------------------------------|-------|
|            |                                                         |                           | $k_1$<br>( $\text{min}^{-1}$ ) | $C_{t,\text{theor}}$<br>( $\text{mg}\cdot\text{L}^{-1}$ ) | $R^2$ | $k_2$<br>( $\text{mg}\cdot\text{L}^{-1}\cdot\text{min}^{-1}$ ) | $C_{t,\text{theor}}$<br>( $\text{mg}\cdot\text{L}^{-1}$ ) | $R^2$ |
| JLUE-MOG-1 | 3.14                                                    | 96.92                     | 0.10                           | 0.08                                                      | 0.95  | $0.23\times 10^{-2}$                                           | 5.81                                                      | 0.98  |
| JLUE-MOG-2 | 9.35                                                    | 90.81                     | 0.04                           | 5.48                                                      | 0.96  | $7.48\times 10^{-4}$                                           | 15.78                                                     | 0.97  |

Table S6 Comparison of CTC degradation by various catalysts.

| Target pollutant | Catalysts                         | Reaction conditions                                              | Average Reaction rate <sup>a</sup>                            | Degradation performance | wavelength | Reference |
|------------------|-----------------------------------|------------------------------------------------------------------|---------------------------------------------------------------|-------------------------|------------|-----------|
| CTC              | NH <sub>2</sub> -MIL-53(Fe)       | CTC: 20mg·L <sup>-1</sup> ;<br>catalyst: 0.2 g·L <sup>-1</sup> ; | 5.3×10 <sup>-4</sup><br>mmol·L <sup>-1</sup> ·h <sup>-1</sup> | around 32%<br>23.3h     | dark       | 1         |
| CTC              | MWCNT/NH <sub>2</sub> -MIL-53(Fe) | CTC: 20mg·L <sup>-1</sup> ;<br>catalyst: 0.2 g·L <sup>-1</sup> ; | 6.7×10 <sup>-4</sup><br>mmol·L <sup>-1</sup> ·h <sup>-1</sup> | around 40%<br>23.3h     | dark       | 1         |
| CTC              | Ag/AgBr/BiOI <sub>3</sub>         | CTC: 10mg·L <sup>-1</sup> ;<br>catalyst: 0.5 g·L <sup>-1</sup> ; | 1.9×10 <sup>-3</sup><br>mmol·L <sup>-1</sup> ·h <sup>-1</sup> | 47.8 %<br>5h            | λ>420 nm   | 2         |
| CTC              | Ppy-BiOI                          | CTC: 30mg·L <sup>-1</sup> ;<br>catalyst: 1.0 g·L <sup>-1</sup> ; | 6.3×10 <sup>-3</sup><br>mmol·L <sup>-1</sup> ·h <sup>-1</sup> | 54 %<br>5h              | λ>420 nm   | 3         |
| CTC              | JLUE-MOG-1                        | CTC: 100mg·L <sup>-1</sup> ;<br>catalyst: 1.0g·L <sup>-1</sup> ; | 1.6×10 <sup>-1</sup><br>mmol·L <sup>-1</sup> ·h <sup>-1</sup> | 98.5%<br>1.17h          | λ>420 nm   | This work |
| CTC              | JLUE-MOG-2                        | CTC: 100mg·L <sup>-1</sup> ;<br>catalyst: 1.0g·L <sup>-1</sup> ; | 1.5×10 <sup>-1</sup><br>mmol·L <sup>-1</sup> ·h <sup>-1</sup> | 92.3%<br>1.17h          | λ>420 nm   | This work |

<sup>a</sup> Average reaction rate for catalysts is defined as:

$$v_{\text{average}} = \frac{\Delta C_{\text{pollutants}}}{\Delta t} \quad (2)$$

Where  $v_{\text{average}}$  is the average reaction rate (mmol·L<sup>-1</sup>·h<sup>-1</sup>);  $\Delta C_{\text{pollutants}}$  is the variation of concentration of pollutants during a period of time (mmol·L<sup>-1</sup>) and  $\Delta t$  is the photocatalytic reaction time (h).

Table S7 Pseudo-second-order kinetic model parameters under various conditions for CTC degradation by JLUE-MOG-1.

| JLUE-MOG-1 | pH | H <sub>2</sub> O <sub>2</sub><br>(mM) | Catalyst<br>(g·L <sup>-1</sup> ) | C <sub>t,exp</sub><br>(mg·L <sup>-1</sup> ) | Removal<br>efficiency<br>(%) | Pseudo-second-order kinetic                                |                                               |                |
|------------|----|---------------------------------------|----------------------------------|---------------------------------------------|------------------------------|------------------------------------------------------------|-----------------------------------------------|----------------|
|            |    |                                       |                                  |                                             |                              | k <sub>2</sub><br>(mg·L <sup>-1</sup> ·min <sup>-1</sup> ) | C <sub>t,theor</sub><br>(mg·L <sup>-1</sup> ) | R <sup>2</sup> |
| dark       | 7  | 0                                     | 1.0                              | 61.19                                       | 38.81                        | 1.11×10 <sup>-4</sup>                                      | 64.77                                         | 0.88           |
| λ>420nm    | 7  | 0                                     | 1.0                              | 7.10                                        | 93.02                        | 0.25×10 <sup>-2</sup>                                      | 9.01                                          | 0.98           |
|            | 7  | 10                                    | 1.0                              | 6.58                                        | 93.40                        | 0.40×10 <sup>-2</sup>                                      | 5.85                                          | 0.99           |

Table S8 Pseudo-first-order kinetic model and pseudo-second-order kinetic model parameters for CTC degradation by JLUE-MOG-1 under various conditions.

| pH | H <sub>2</sub> O <sub>2</sub><br>(mM) | Catalyst<br>(g·L <sup>-1</sup> ) | C <sub>t,exp</sub><br>(mg·L <sup>-1</sup> ) | Removal<br>efficiency<br>y<br>(%) | Pseudo-first-order<br>kinetic          |                | Pseudo-second-<br>order kinetic                            |                |
|----|---------------------------------------|----------------------------------|---------------------------------------------|-----------------------------------|----------------------------------------|----------------|------------------------------------------------------------|----------------|
|    |                                       |                                  |                                             |                                   | k <sub>1</sub><br>(min <sup>-1</sup> ) | R <sup>2</sup> | k <sub>2</sub><br>(mg·L <sup>-1</sup> ·min <sup>-1</sup> ) | R <sup>2</sup> |
| 3  | 10                                    | 1.0                              | 6.67                                        | 92.61                             | 0.11                                   | 0.98           | 0.27×10 <sup>-2</sup>                                      | 3              |
| 5  | 10                                    | 1.0                              | 13.49                                       | 85.05                             | 0.15                                   | 0.88           | 0.34×10 <sup>-2</sup>                                      | 5              |
| 7  | 5                                     | 1.0                              | 5.94                                        | 94.04                             | 0.16                                   | 0.96           | 0.43×10 <sup>-2</sup>                                      | 7              |
| 7  | 20                                    | 1.0                              | 13.49                                       | 86.47                             | 0.15                                   | 0.88           | 0.34×10 <sup>-2</sup>                                      | 7              |
| 7  | 10                                    | 0.6                              | 7.40                                        | 92.58                             | 0.08                                   | 0.98           | 0.19×10 <sup>-2</sup>                                      | 7              |
| 7  | 10                                    | 0.8                              | 6.61                                        | 92.97                             | 0.09                                   | 0.98           | 0.22×10 <sup>-2</sup>                                      | 7              |
| 7  | 10                                    | 1.0                              | 6.58                                        | 93.40                             | 0.16                                   | 0.96           | 0.40×10 <sup>-2</sup>                                      | 7              |
| 7  | 10                                    | 1.2                              | 6.41                                        | 93.57                             | 0.17                                   | 0.97           | 0.45×10 <sup>-2</sup>                                      | 7              |

Table S9 Pseudo-first-order kinetic model and pseudo-second-order kinetic model parameters for CTC degradation by JLUE-MOG-2 under various conditions.

| pH | H <sub>2</sub> O <sub>2</sub><br>(mM) | Catalyst<br>(g·L <sup>-1</sup> ) | C <sub>t,exp</sub><br>(mg·L <sup>-1</sup> ) | Removal<br>efficiency<br>(%) | Pseudo-first-<br>order kinetic         |                | Pseudo-<br>second-order<br>kinetic                         |                |
|----|---------------------------------------|----------------------------------|---------------------------------------------|------------------------------|----------------------------------------|----------------|------------------------------------------------------------|----------------|
|    |                                       |                                  |                                             |                              | k <sub>1</sub><br>(min <sup>-1</sup> ) | R <sup>2</sup> | k <sub>2</sub><br>(mg·L <sup>-1</sup> ·min <sup>-1</sup> ) | R <sup>2</sup> |
| 3  | 10                                    | 1.0                              | 34.92                                       | 59.56                        | 0.03                                   | 0.92           | 5.06×10 <sup>-4</sup>                                      | 0.99           |
| 5  | 10                                    | 1.0                              | 17.02                                       | 82.54                        | 0.05                                   | 0.92           | 9.69×10 <sup>-4</sup>                                      | 0.99           |
| 7  | 5                                     | 1.0                              | 24.69                                       | 74.67                        | 0.04                                   | 0.94           | 7.24×10 <sup>-4</sup>                                      | 0.98           |
| 7  | 20                                    | 1.0                              | 17.02                                       | 82.54                        | 0.05                                   | 0.97           | 9.69×10 <sup>-4</sup>                                      | 0.99           |
| 7  | 10                                    | 0.6                              | 44.60                                       | 54.24                        | 0.02                                   | 0.89           | 3.16×10 <sup>-4</sup>                                      | 0.94           |
| 7  | 10                                    | 0.8                              | 35.04                                       | 64.05                        | 0.03                                   | 0.91           | 4.56×10 <sup>-4</sup>                                      | 0.96           |
| 7  | 10                                    | 1.0                              | 24.14                                       | 75.23                        | 0.04                                   | 0.94           | 7.31×10 <sup>-4</sup>                                      | 0.98           |
| 7  | 10                                    | 1.2                              | 16.96                                       | 82.64                        | 0.06                                   | 0.93           | 0.12×10 <sup>-2</sup>                                      | 0.98           |

### Supporting references

- 1 W. P. Xiong, Z. T. Zeng, X. Li, G. M. Zeng, R. Xiao, Z. H. Yang, Y. Y. Zhou, C. Zhang, M. Cheng, L. Hu, C. Y. Zhou, L. Qin, R. Xu and Y. R. Zhang, *Chemosphere*, 2018, **210**, 1061–1069.
- 2 F. Chen, H. W. Huang, C. Zeng, X. Du and Y. H. Zhang, *ACS Sustainable Chem. Eng.*, 2017, **5**, 7777–7791.
- 3 J. J. Xu, Y. M. Hu, C. Zeng, Y. H. Zhang and H. W. Huang, *J. Colloid Interface Sci.*, 2017, **505**, 719–727.
